# Supplementary material for: Synthesis of a new photosensitizer for photodynamic and photothermal synergistic cancer therapy
Source: Royal Society of Chemistry journal article supplement (doi:10.1039/d3ma00400g), 2023-01-01
Supplement: d3ma00400g1.pdf [file d3ma00400g1.pdf]

## Supporting information

### Synthesis of a new photosensitizer for photodynamic and photothermal synergistic cancer therapy

Jun Deng<sup>a\*</sup>, Xiaohua Xia<sup>a</sup>, Hua Yuan<sup>a</sup>, Zhiqiang Chen<sup>b</sup>, Xin Jiang<sup>b</sup>, Dengfeng Zou<sup>b\*</sup>, Qiang Wang<sup>a\*</sup>

*a.* Department of Emergency Surgery, Kunshan Hospital Affiliated to Jiangsu University Kunshan, 215300, Jiangsu, P.R. China. Email: [yaya850830@126.com](mailto:yaya850830@126.com), [wq.516@163.com](mailto:wq.516@163.com).

*b.* School of Pharmacy, Guilin Medical University, Guilin, 541004, Guangxi, P.R. China. Email: [zdf1226@126.com](mailto:zdf1226@126.com).

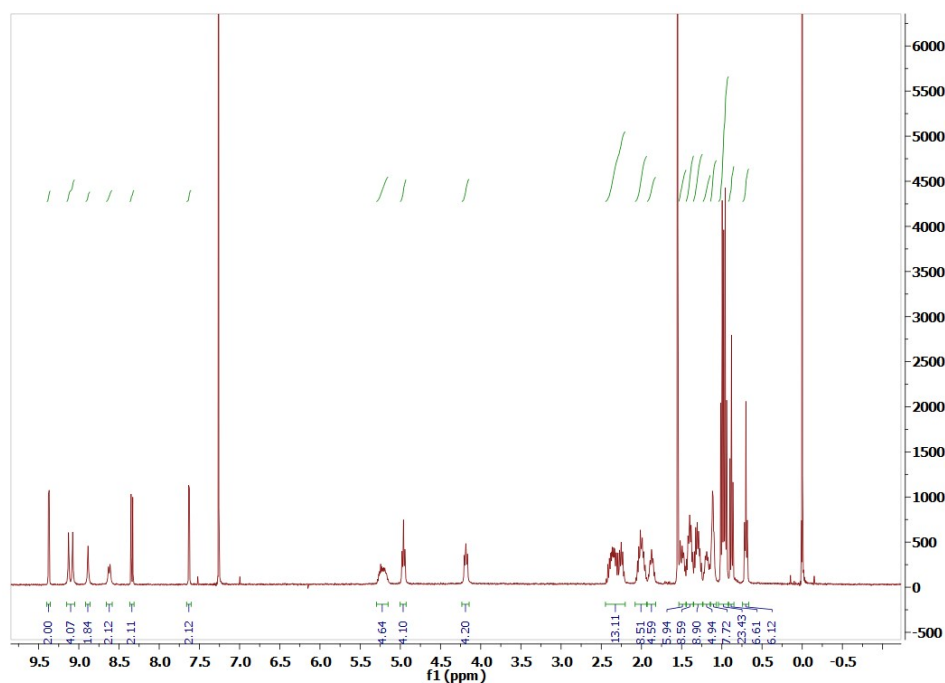

Fig. S1 <sup>1</sup>H NMR of PDIDPP in CDCl<sub>3</sub>.

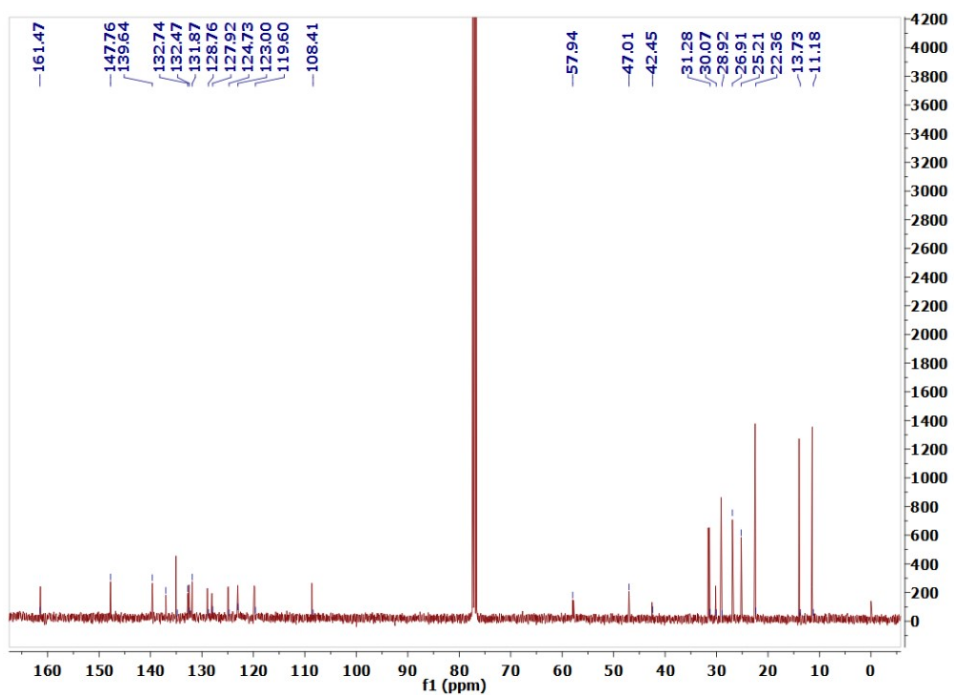

Fig. S2  $^{13}\text{C}$ NMR of PDIDPP in  $\text{CDCl}_3$ .

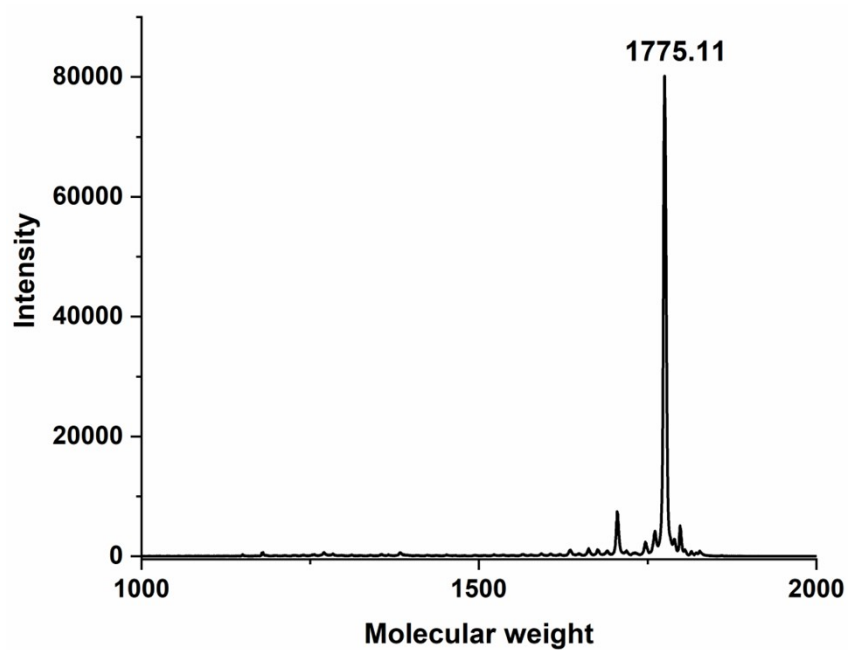

Fig. S3 Maldi-tof of PDIDPP.

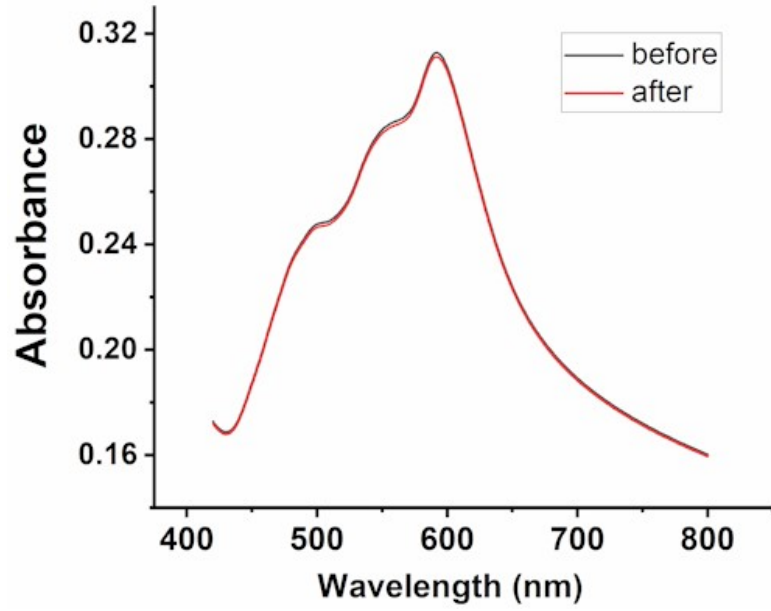

Fig. S4 The absorbance spectra of PDIDPP NPs before and after irradiation.

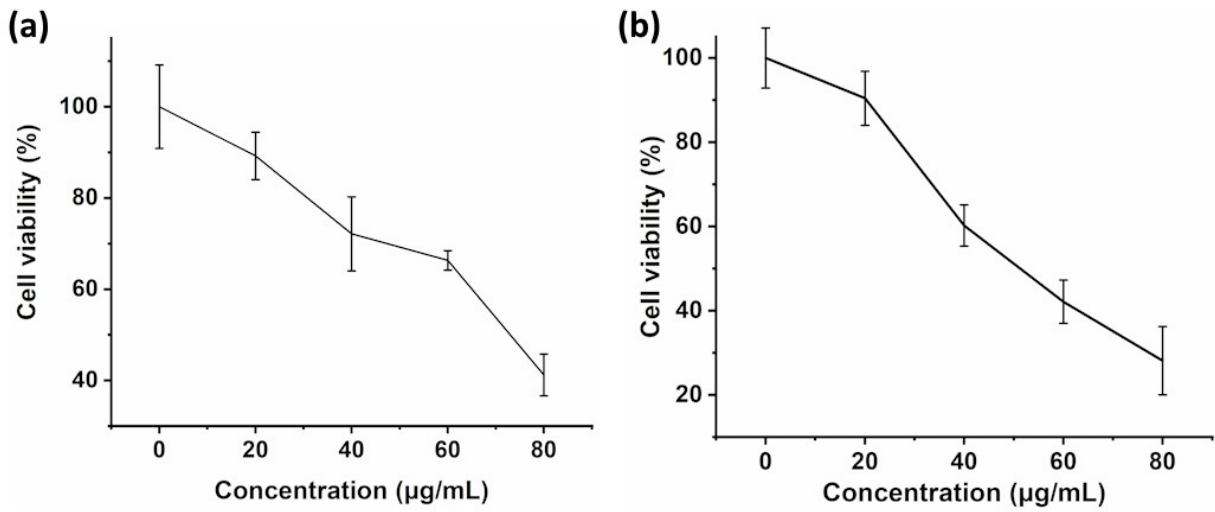

Fig.S5 MTT assay of PDIDPP NPs on U87MG cells. (a) PDT only group using 37°C water bath maintain a suitable temperature. (b) PTT only with GSH as the ROS scavenger (laser power 500 mW/cm<sup>2</sup>.)

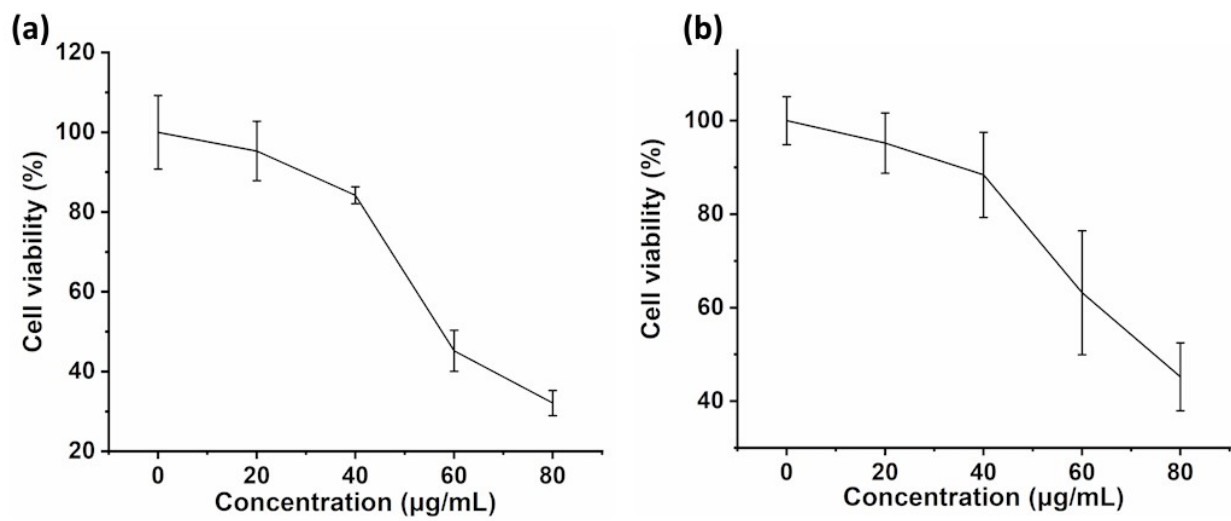

Fig.S6 MTT assay of PDIDPP NPs on HCT-116 cells. (a) PDT only group using 37°C water bath maintain a suitable temperature. (b) PTT only with GSH as the ROS scavenger (laser power 500 mW/cm<sup>2</sup>.)
